# Supplementary material
Source: PubMed Central journal article supplement (PMC2529070)
Supplement: 0806202105_0806202105SI.pdf [file 0806202105_0806202105SI.pdf]

# Supporting Information

Pichiorri *et al.* 10.1073/pnas.0806202105

## SI Methods

**Cell Collection and Total RNA Purification.** Samples included PCs from 16 newly diagnosed cases of MM, 6 patients with MGUS, and 6 healthy donors (normal PCs). Written informed consent was obtained in keeping with institutional policies. PC isolation from mononuclear cell fraction was performed by immunomagnetic bead selection with monoclonal mouse anti-human CD138 antibodies using the AutoMACs automated separation system (Miltenyi-Biotec). PC purity is shown in Table 2, immunocytochemistry for cytoplasmic light-chain Ig (Ig), and morphology by Wright-Giemsa staining. Three of the six healthy PCs were obtained from ALLCELLS, and the purity of PCs was assessed by FACScan Analysis and was more than 80%. MM cell lines (listed in Table S3) [courtesy of Dr M. Kuehl (National Cancer Institute, MD), Dr. Joshua Epstein (Little Rock, AR), Dr. S. Rosen (Chicago, IL), Dr. M. Gramatzki (Kiel, Germany)] and an EBV-transformed B-lymphoblastoid cell line (ARH-77, ARK, UCLA-1) were grown as recommended (American Type Culture Collection). Total RNA was isolated with TRIzol extraction reagent (Invitrogen).

**Luciferase Reporter Vectors.** PCAF and SOCS1 3'UTR containing predicted microRNA binding site were amplified by PCR from genomic DNA (293T/17cells) and inserted into pGL3 control vector (Promega) by using an XbaI site immediately downstream from the stop codon of firefly luciferase. Deletion of the first six nucleotides of each complementary seed-region complementary site were inserted in mutant constructs using quick-change site-directed mutagenesis kit (Stratagene), according to the manufacturer's protocol. Primer sequences are available upon request.

**Luciferase Assays.** QBI293 and Meg01 cells were cotransfected in six-well plates with 1  $\mu$ g of pGL3 firefly luciferase reporter vector (see luciferase reporter vector method), 0.1  $\mu$ g of the phRL-SV40 control vector (Promega), and 100-nM miRNA precursors (Ambion) using Lipofectamine 2000 (Invitrogen). Firefly and Renilla luciferase activities were measured consecutively by using the Dual Luciferase Assay (Promega) 24 h after transfection. Each reporter plasmid was transfected at least twice (on different days) and each sample was assayed in triplicate.

**Xenograft Model.** Studies were performed under an Institutional Animal Care and Use Committee (IACUC) approved protocol.

Eight-week-old male athymic *nu/nu* mice (Charles River Laboratories) were maintained in accordance with IACUC procedures and guidelines. A mixture of  $30 \times 10^6$  U266 cells or JLN3 transfected cells were suspended in 0.10 ml of extracellular matrix gel (BD Biosciences) and the mixture was injected s.c. into the right and left flanks. Serial measurements of xenograft growth were performed, and tumor volume was estimated using the formula  $\frac{4}{3} \pi (L \cdot W \cdot H/8)$ .

**Western Blotting.** Immunoblot analyses were performed as described (10), using: rabbit polyclonal antiSOCS-1 (Abcam); rabbit polyclonal antisera against GAPDH, Bim, Stat-3, P-Stat-3 (Tyr-705) (Cell Signaling); rabbit polyclonal PCAF, and monoclonal p53 (Santa Cruz). Protein levels were normalized relative to  $\beta$ -ACTIN or GAPDH level, detected with appropriate antisera (Santa Cruz Biotechnology).

**UV and Nutlin3a Treatment.** MM1s and U266 MM cell lines were transfected with *miR-181s*, *miR-106b-25*, *miR-32*, and *miR-19s* ASOs as described above, and at 24 h after transfection U266 cells were treated with 10  $\mu$ M Nutlin3a (Cayman Chemical Company) and MM1S were treated with 6 J/m<sup>2</sup> UV (Ultra LUM. Inc.) and harvested at the time described in Results .

**Data Analysis.** Microarray images were analyzed by using GenePix Pro 6.0. Average values of the replicate spots of each miRNA were background-subtracted and subject to further analysis. MiRNAs were retained when present in at least 50% of samples and when at least 50% of the miRNA had a fold-change of more than 1.5 from the gene median. Absent calls were thresholded to 4.5 in log<sub>2</sub> scale before normalization and statistical analysis. This level is the average minimum intensity level detected above background in miRNA chip experiments. Quantile normalization was implemented using the Bioconductor package/function. Differentially expressed microRNAs were identified by using the univariate *t* test within the BRB tools version 3.5.0 set with a significant univariately at alpha level equal to 0.01. This tool is designed to analyze data using the parametric test *t*/F tests, and random variance *t*/F tests. The criteria for inclusion of a gene in the gene list is either a P value less than a specified threshold value, or specified limits on the number of false discoveries or proportion of false discoveries. The latter are controlled by use of multivariate permutation test.

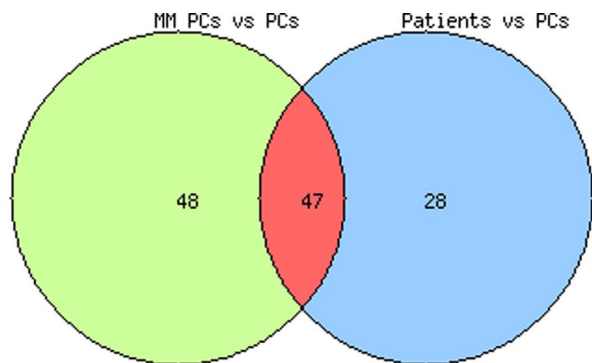

### A MM PCs vs PCs

hsa-let-7e  
 hsa-let-7e\*  
 hsa-let-7f-1\*  
 hsa-let-7i  
 hsa-miR-101  
 hsa-miR-106b\*  
 hsa-miR-122\*  
 hsa-miR-125b-2\*  
 hsa-miR-130b  
 hsa-miR-133a  
 hsa-miR-133b  
 hsa-miR-135a\*  
 hsa-miR-135b\*  
 hsa-miR-137  
 hsa-miR-139-3p  
 hsa-miR-140-3p  
 hsa-miR-142-5p  
 hsa-miR-147  
 hsa-miR-16  
 hsa-miR-17  
 hsa-miR-181a\*  
 hsa-miR-181a-2\*  
 hsa-miR-183  
 hsa-miR-193a-3p  
 hsa-miR-194\*  
 hsa-miR-195  
 hsa-miR-19a  
 hsa-miR-21\*  
 hsa-miR-217  
 hsa-miR-219-2-3p  
 hsa-miR-27b  
 hsa-miR-296-3p  
 hsa-miR-299-3p  
 hsa-miR-29a  
 hsa-miR-29c  
 hsa-miR-301a  
 hsa-miR-302a  
 hsa-miR-302c  
 hsa-miR-30c  
 hsa-miR-30e  
 hsa-miR-320  
 hsa-miR-323-3p  
 hsa-miR-324-3p  
 hsa-miR-33a  
 hsa-miR-342-3p  
 hsa-miR-34b  
 hsa-miR-367\*  
 hsa-miR-374a\*

### C Common miRNAs

hsa-miR-100  
 hsa-miR-103  
 hsa-miR-106a  
 hsa-miR-106b  
 hsa-miR-107  
 hsa-miR-125a-3p  
 hsa-miR-125b  
 hsa-miR-130a  
 hsa-miR-138-1\*  
 hsa-miR-146a  
 hsa-miR-15b  
 hsa-miR-16-2\*  
 hsa-miR-181a  
 hsa-miR-181b  
 hsa-miR-188-5p  
 hsa-miR-191  
 hsa-miR-192\*  
 hsa-miR-193a-5p  
 hsa-miR-196b  
 hsa-miR-198  
 hsa-miR-19b  
 hsa-miR-208  
 hsa-miR-20a  
 hsa-miR-21  
 hsa-miR-214  
 hsa-miR-221  
 hsa-miR-223  
 hsa-miR-23a  
 hsa-miR-23a\*  
 hsa-miR-23b  
 hsa-miR-25  
 hsa-miR-26a  
 hsa-miR-26a-1\*  
 hsa-miR-26b  
 hsa-miR-27a  
 hsa-miR-30a  
 hsa-miR-30b\*  
 hsa-miR-30d  
 hsa-miR-32  
 hsa-miR-323-5p  
 hsa-miR-328  
 hsa-miR-335  
 hsa-miR-335\*  
 hsa-miR-376c  
 hsa-miR-92a  
 hsa-miR-93  
 hsa-miR-95

### B Patients vs PCs

hsa-miR-101\*  
 hsa-miR-105\*  
 hsa-miR-129-3p  
 hsa-miR-148a\*  
 hsa-miR-149  
 hsa-miR-15a  
 hsa-miR-181c\*  
 hsa-miR-186  
 hsa-miR-187  
 hsa-miR-190  
 hsa-miR-19b-1\*  
 hsa-miR-200b  
 hsa-miR-200c\*  
 hsa-miR-202  
 hsa-miR-218  
 hsa-miR-25\*  
 hsa-miR-302b  
 hsa-miR-302d\*  
 hsa-miR-30a\*  
 hsa-miR-30c-1\*  
 hsa-miR-338-3p  
 hsa-miR-339-3p  
 hsa-miR-33b  
 hsa-miR-346  
 hsa-miR-373\*  
 hsa-miR-7  
 hsa-miR-92a-1\*

**Fig. S1.** Common miRNAs expression. A Venn Diagram showing the common miRNAs (C) between the two class of comparisons, MM PCs versus healthy PCs (A) and PCs from MM patients versus healthy PCs (B).

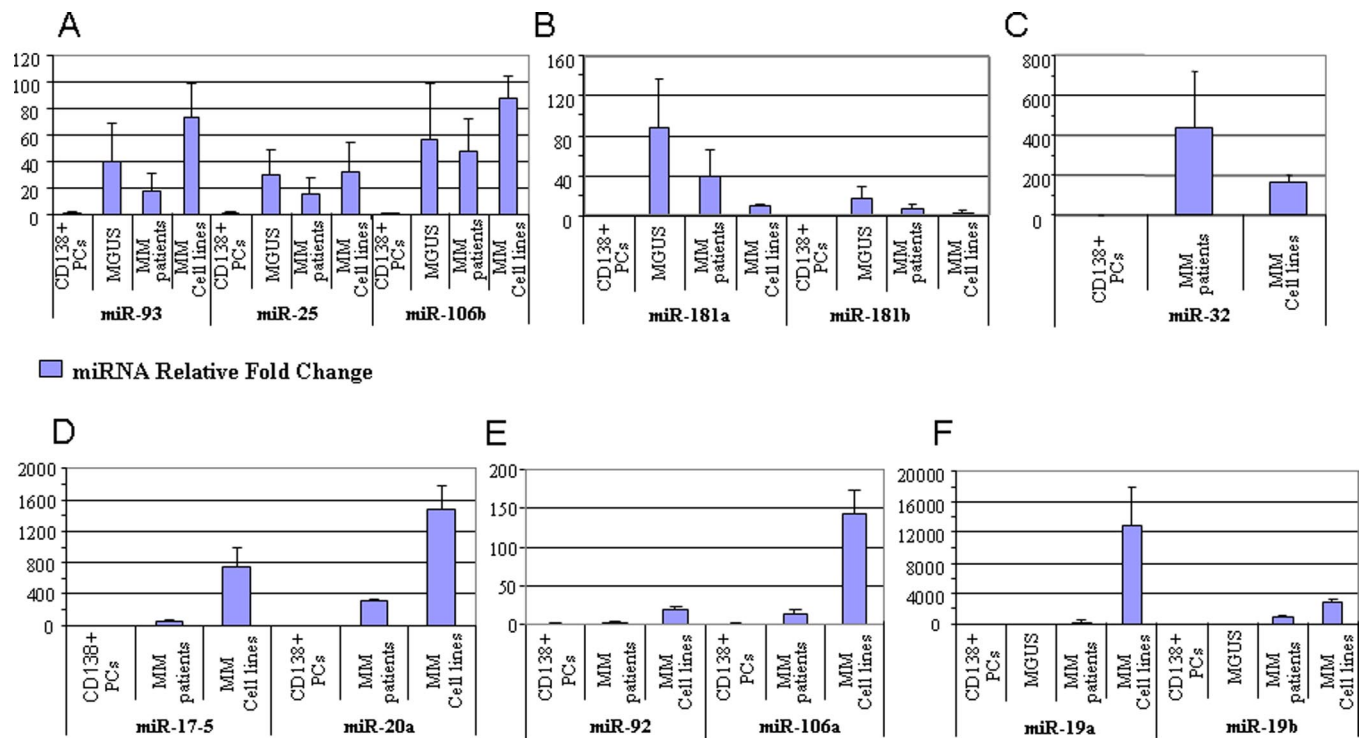

**Fig. S2.** Validation of microarray data in MM patients, MGUS and MM cell lines versus CD138+PCs healthy by q-RT-PCR. Average *miR-93*, *miR-25* and *miR-106b* (A), *miR-181a* and *miR-181b* (B), *miR-32* (C), *miR-17-5* and *miR-20a* (D), *miR-92* and *miR-106a* (E), and *miR-19a* and *miR-19b* (F) expression in CD138+PCs from healthy donors ( $n = 3$ ), from MGUS ( $n = 3$ ), from MM patients ( $n = 6$ ), and MM cell lines ( $n = 15$ ) measured by q-RT-PCR. Bars represent relative fold-changes between MM PCs, MGUS, and healthy PCs  $\pm$  SE. The miRNA expression between the different groups was compared after normalization with RNU6B.





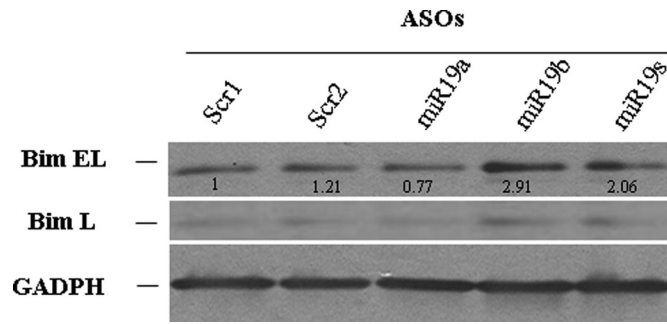

**Fig. S5.** *miR-17-92* cluster targets Bim. Immunoblot analyses showing BIM-EL, BIM-L, and GADPH expression at 48 h after transfection with *miR-19a* or *miR-19b* or together ASOs in U266 cells. Densitometry based on GADPH levels shows increased level of BIM-EL and BIM-L in the presence of *miR-19b* and *miR-19a* and *b* together ASOs in U266 cells.

**Table S1. Patient samples clinical data**

| Sample BM      | Sex | Age | CD138 + PCs % | Purification                    |
|----------------|-----|-----|---------------|---------------------------------|
| <b>MM</b>      |     |     |               |                                 |
| patients       |     |     |               |                                 |
| Pt1            | F   | 52  | 75%           | Miltenyi (CD138) / Trizol (RNA) |
| Pt2            | M   | 69  | 65%           | Miltenyi (CD138) / Trizol (RNA) |
| Pt3            | F   | 48  | 85%           | Miltenyi (CD138) / Trizol (RNA) |
| Pt4            | M   | 59  | 75%           | Miltenyi (CD138) / Trizol (RNA) |
| Pt5            | M   | 54  | 90%           | Miltenyi (CD138) / Trizol (RNA) |
| Pt6            | F   | 53  | 80%           | Miltenyi (CD138) / Trizol (RNA) |
| Pt7            | M   | 62  | 80%           | Miltenyi (CD138) / Trizol (RNA) |
| Pt8            | F   | 71  | 90%           | Miltenyi (CD138) / Trizol (RNA) |
| Pt9            | F   | 61  | 70%           | Miltenyi (CD138) / Trizol (RNA) |
| Pt10           | F   | 49  | 65%           | Miltenyi (CD138) / Trizol (RNA) |
| Pt11           | M   | 72  | 83%           | Miltenyi (CD138) / Trizol (RNA) |
| Pt12           | M   | 80  | 85%           | Miltenyi (CD138) / Trizol (RNA) |
| Pt13           | F   | 71  | 97%           | Miltenyi (CD138) / Trizol (RNA) |
| Pt14           | F   | 47  | 82%           | Miltenyi (CD138) / Trizol (RNA) |
| Pt15           | M   | 81  | 96%           | Miltenyi (CD138) / Trizol (RNA) |
| Pt16           | M   | 37  | 94%           | Miltenyi (CD138) / Trizol (RNA) |
| <b>MGUS</b>    |     |     |               |                                 |
| MGUS 1         | M   | 55  | 70%           | Miltenyi (CD138) / Trizol (RNA) |
| MGUS 2         | M   | 71  | 75%           | Miltenyi (CD138) / Trizol (RNA) |
| MGUS 3         | F   | 65  | 70%           | Miltenyi (CD138) / Trizol (RNA) |
| MGUS 4         | M   | 62  | 92%           | Miltenyi (CD138) / Trizol (RNA) |
| MGUS 5         | M   | 58  | 50%           | Miltenyi (CD138) / Trizol (RNA) |
| MGUS 6         | F   | 78  | 73%           | Miltenyi (CD138) / Trizol (RNA) |
| <b>Healthy</b> |     |     |               |                                 |
| Healthy1       | M   | 81  | 71%           | Miltenyi (CD138) / Trizol (RNA) |
| Healthy2       | M   | 68  | 75%           | Miltenyi (CD138) / Trizol (RNA) |
| Healthy3       | F   | 64  | 80%           | Miltenyi (CD138) / Trizol (RNA) |
| Healthy4       | F   | 45  | 84%           | FACScan (CD138)/Trizol (RNA)    |
| Healthy5       | F   | 43  | 91%           | FACScan (CD138)/Trizol (RNA)    |
| Healthy6       | F   | 44  | 81%           | FACScan (CD138)/Trizol (RNA)    |

**Table S2. miRNAs differentially expressed between MGUS versus healthy PCs**

| miRNA                  | Parametric <i>P</i> value | FDR*      | Fold change |
|------------------------|---------------------------|-----------|-------------|
| Up-regulated in MGUS   |                           |           |             |
| hsa-miR-95             | 0.022746                  | 0.1681209 | 25.91       |
| hsa-miR-30a            | 0.0019756                 | 0.127183  | 18.103      |
| hsa-miR-30b            | 0.0082978                 | 0.1681209 | 16.184      |
| hsa-miR-26b            | 0.0250236                 | 0.1690601 | 16.018      |
| hsa-miR-21             | 0.0153221                 | 0.1681209 | 15.616      |
| hsa-miR-126            | 0.0335521                 | 0.1822612 | 14.62       |
| hsa-miR-142-5p         | 0.0100072                 | 0.1681209 | 14.545      |
| hsa-miR-26a            | 0.0226355                 | 0.1681209 | 14.104      |
| hsa-miR-181a           | 0.0266934                 | 0.1714849 | 13.98       |
| hsa-miR-330-5p         | 0.0029962                 | 0.127183  | 13.694      |
| hsa-miR-93             | 0.0164683                 | 0.1681209 | 13.416      |
| hsa-miR-17             | 0.0051508                 | 0.1681209 | 13.365      |
| hsa-miR-16             | 0.0216348                 | 0.1681209 | 12.977      |
| has-miR-1              | 0.0029996                 | 0.127183  | 12.417      |
| hsa-miR-200c           | 0.0174383                 | 0.1681209 | 12.16       |
| hsa-miR-30c            | 0.0147266                 | 0.1681209 | 11.397      |
| hsa-miR-195            | 0.0163475                 | 0.1681209 | 11.022      |
| hsa-miR-181c           | 0.0377125                 | 0.1950012 | 10.677      |
| hsa-miR-106b           | 0.0018947                 | 0.127183  | 10.453      |
| hsa-miR-23a            | 0.0318172                 | 0.1822612 | 10.068      |
| hsa-let-7f             | 0.013552                  | 0.1681209 | 10.002      |
| hsa-miR-130b           | 0.0024791                 | 0.127183  | 9.488       |
| hsa-miR-29b            | 0.0135475                 | 0.1681209 | 8.606       |
| hsa-miR-126*           | 0.0126018                 | 0.1681209 | 8.112       |
| hsa-miR-103            | 0.0153529                 | 0.1681209 | 7.781       |
| hsa-miR-133b           | 0.0304084                 | 0.1822612 | 7.38        |
| hsa-miR-9*             | 0.0498178                 | 0.2155382 | 7.27        |
| hsa-miR-29a            | 0.0145431                 | 0.1681209 | 7.216       |
| hsa-miR-107            | 0.0220383                 | 0.1681209 | 7.117       |
| hsa-miR-25             | 0.0206808                 | 0.1681209 | 7.041       |
| hsa-miR-376c           | 0.0222829                 | 0.1681209 | 6.9         |
| hsa-miR-29c            | 0.0096085                 | 0.1681209 | 6.709       |
| hsa-miR-106a           | 0.0473103                 | 0.2155382 | 5.843       |
| hsa-miR-15a            | 0.0155799                 | 0.1681209 | 5.302       |
| hsa-miR-148a           | 0.0343889                 | 0.1822612 | 4.217       |
| hsa-miR-210            | 0.0341297                 | 0.1822612 | 4.178       |
| hsa-miR-27a            | 0.0222155                 | 0.1681209 | 4.106       |
| hsa-miR-222            | 0.0179643                 | 0.1681209 | 3.781       |
| hsa-miR-30d            | 0.0389809                 | 0.1967607 | 3.599       |
| hsa-let-7c             | 0.0314064                 | 0.1822612 | 3.313       |
| hsa-let-7 g            | 0.0455525                 | 0.2155382 | 2.915       |
| Down-regulated in MGUS |                           |           |             |
| hsa-miR-187            | 0.0439327                 | 0.2155382 | 0.4         |
| hsa-miR-124*           | 0.027717                  | 0.1728236 | 0.388       |
| hsa-miR-96             | 0.0474581                 | 0.2155382 | 0.298       |
| hsa-miR-326            | 0.0255185                 | 0.1690601 | 0.185       |
| hsa-miR-328            | 0.0487384                 | 0.2155382 | 0.152       |
| hsa-miR-339-5p         | 0.0237907                 | 0.1681209 | 0.099       |
| hsa-miR-34c-3p         | 0.0236422                 | 0.1681209 | 0.066       |

MiRNAs are sorted by *P* value of the univariate test (BRB tools). The first 48 genes are significant at the nominal 0.05 level of the univariate test.  
 \*FDR, False discovery rate or *q* value is the expected percentage of genes identified by chance.[A]



**Table S3. MM cell lines used for microarray analysis and stem-loop q-RT-PCR**

| MM cell line | Microarray analysis | Stem-loop q-RT-PCR |
|--------------|---------------------|--------------------|
| ARH77        | X                   | X                  |
| KMS11        | X                   |                    |
| U266         | X                   | X                  |
| ARK          | X                   | X                  |
| ARP-1        | X                   | X                  |
| Delta 47     | X                   |                    |
| Dp6p43       | X                   |                    |
| EJM          | X                   | X                  |
| FLAM 76      | X                   |                    |
| FR4          | X                   |                    |
| H1112        | X                   |                    |
| H929         | X                   |                    |
| INA6         | X                   |                    |
| JIM3         | X                   |                    |
| JJN3         | X                   | X                  |
| JK-6L        | X                   |                    |
| KARPAS 620   | X                   |                    |
| Kas6-p11p23  | X                   |                    |
| KHM 1B       | X                   |                    |
| KMS-12BM     | X                   |                    |
| KMS-12PE     | X                   | X                  |
| KMS18        | X                   |                    |
| KMS26        | X                   |                    |
| KMS-28BM     | X                   |                    |
| KMS-28PE     | X                   | X                  |
| KMS34        | X                   |                    |
| LP1          | X                   |                    |
| MM-M1        | X                   |                    |
| OCI MY1      | X                   |                    |
| OCI MY5      | X                   |                    |
| OCI MY7      | X                   |                    |
| OPM1         | X                   |                    |
| PE1          | X                   |                    |
| PE2          | X                   |                    |
| Sachi        | X                   |                    |
| SKMM2        | X                   |                    |
| UCLA1        | X                   |                    |
| XG1          | X                   |                    |
| XG2          | X                   |                    |
| XG6          | X                   |                    |
| XG7          | X                   |                    |
| RPMI8226     |                     | X                  |
| KARPAS25     |                     | X                  |
| KARPAS1272   |                     | X                  |
| L363         |                     | X                  |
| MM144        |                     | X                  |
| MM.1 s       |                     | X                  |
| ARD          |                     | X                  |
| U266         |                     | X                  |

**Table S4. miRNAs differentially expressed between MM patients and cell lines (MM PCs) versus healthy PCs**

| miRNA                           | Parametric <i>P</i> value | FDR      | Fold change |
|---------------------------------|---------------------------|----------|-------------|
| <b>Up-regulated in MM PCs</b>   |                           |          |             |
| hsa-miR-32                      | < 1e-07                   | < 1e-07  | 288.986     |
| hsa-miR-25                      | < 1e-07                   | < 1e-07  | 224.305     |
| hsa-miR-95                      | < 1e-07                   | < 1e-07  | 201.692     |
| hsa-miR-20a                     | < 1e-07                   | < 1e-07  | 72.323      |
| hsa-miR-106a                    | < 1e-07                   | < 1e-07  | 67.069      |
| hsa-miR-27a                     | < 1e-07                   | < 1e-07  | 54.76       |
| hsa-miR-93                      | < 1e-07                   | < 1e-07  | 48.178      |
| hsa-miR-106b                    | < 1e-07                   | < 1e-07  | 38.494      |
| hsa-miR-17                      | 2.00E-07                  | 2.60E-06 | 37.595      |
| hsa-miR-19a                     | 6.27E-05                  | 0.000442 | 33.745      |
| hsa-miR-125b                    | 1.41E-05                  | 0.00013  | 27.954      |
| hsa-miR-181a                    | 0.005455                  | 0.017466 | 25.479      |
| hsa-miR-100                     | 1.00E-07                  | 1.40E-06 | 25.214      |
| hsa-miR-21                      | 0.000197                  | 0.001229 | 24.14       |
| hsa-miR-107                     | < 1e-07                   | < 1e-07  | 20.1        |
| hsa-miR-21                      | 0.000914                  | 0.004538 | 19.402      |
| hsa-miR-33a                     | 6.23E-05                  | 0.000442 | 19.179      |
| hsa-miR-183                     | 0.000111                  | 0.000722 | 18.952      |
| hsa-miR-34b                     | 5.00E-07                  | 6.10E-06 | 18.494*     |
| hsa-miR-26b                     | < 1e-07                   | < 1e-07  | 18.386      |
| hsa-miR-130b                    | 1.50E-05                  | 0.000131 | 16.214      |
| hsa-miR-191                     | 2.00E-07                  | 2.60E-06 | 15.675      |
| hsa-miR-103                     | < 1e-07                   | < 1e-07  | 15.332      |
| hsa-miR-193a-3p                 | 0.000522                  | 0.002918 | 13.738      |
| hsa-miR-181b                    | 0.001059                  | 0.005161 | 13.735      |
| hsa-miR-16-2*                   | 1.30E-06                  | 1.39E-05 | 13.46       |
| hsa-miR-214                     | < 1e-07                   | < 1e-07  | 13.389      |
| hsa-miR-15b                     | 0.001777                  | 0.007442 | 12.941      |
| hsa-miR-130a                    | 0.001496                  | 0.006911 | 12.729      |
| hsa-miR-30c                     | 2.77E-05                  | 0.000225 | 11.992      |
| hsa-miR-142-5p                  | 1.68E-05                  | 0.000141 | 11.824      |
| hsa-miR-92a                     | < 1e-07                   | < 1e-07  | 11.603      |
| hsa-miR-376c                    | 0.001601                  | 0.007033 | 11.296      |
| hsa-miR-27b                     | 0.000464                  | 0.002705 | 10.378      |
| hsa-miR-26a                     | 1.00E-07                  | 1.40E-06 | 10.089      |
| hsa-miR-30e                     | 0.00258                   | 0.010097 | 9.6         |
| hsa-miR-195                     | 1.00E-06                  | 1.12E-05 | 9.309       |
| hsa-miR-30a                     | 3.40E-06                  | 3.37E-05 | 8.505       |
| hsa-miR-221                     | 0.0026                    | 0.010097 | 8.481       |
| hsa-miR-208                     | 0.001589                  | 0.007033 | 8.479       |
| hsa-miR-16                      | 7.06E-05                  | 0.000485 | 7.541       |
| hsa-miR-19b                     | 0.001988                  | 0.008071 | 7.143       |
| hsa-miR-147                     | 0.005475                  | 0.017466 | 7           |
| hsa-miR-23a                     | 3.55E-05                  | 0.000273 | 6.982       |
| hsa-miR-101                     | 0.008741                  | 0.024658 | 6.783       |
| hsa-miR-192*                    | 1.00E-07                  | 1.40E-06 | 6.629       |
| hsa-miR-146a                    | 0.009857                  | 0.027516 | 6.582       |
| hsa-miR-133b                    | 0.004106                  | 0.014109 | 6.491       |
| hsa-miR-30d                     | 3.56E-05                  | 0.000273 | 6.075       |
| hsa-miR-122*                    | 0.00168                   | 0.007262 | 5.967       |
| hsa-miR-133a                    | 0.000748                  | 0.003932 | 5.75        |
| hsa-miR-138-1*                  | < 1e-07                   | < 1e-07  | 5.474       |
| hsa-miR-23b                     | 3.78E-05                  | 0.000281 | 5.058       |
| hsa-miR-181a-2*                 | 0.008702                  | 0.024658 | 4.222       |
| hsa-miR-29a                     | 0.000786                  | 0.003975 | 3.788       |
| hsa-let-7i                      | 0.00121                   | 0.005689 | 3.346       |
| hsa-miR-320                     | 0.002071                  | 0.008283 | 2.537       |
| hsa-miR-342-3p                  | 0.00793                   | 0.022851 | 2.332       |
| hsa-miR-29c                     | 0.003373                  | 0.012596 | 2.293       |
| hsa-let-7e*                     | 0.005727                  | 0.017846 | 2.027       |
| <b>Down Regulated in MM PCs</b> |                           |          |             |
| hsa-miR-23a*                    | < 1e-07                   | < 1e-07  | 0.026       |
| hsa-miR-223                     | 0.007363                  | 0.021447 | 0.035       |
| hsa-miR-106b*                   | 2.30E-06                  | 2.37E-05 | 0.05        |
| hsa-miR-125b-2*                 | < 1e-07                   | < 1e-07  | 0.091       |
| hsa-miR-188-5p                  | 0.003548                  | 0.012848 | 0.117       |



**Table S5. miRNAs differentially expressed between PCs from MM patients versus healthy PCs**

| miRNA                         | Parametric <i>P</i> value | FDR       | Fold change |
|-------------------------------|---------------------------|-----------|-------------|
| Up-regulated in MM patients   |                           |           |             |
| hsa-miR-25                    | 3e-07                     | 3.18e-05  | 71.396      |
| hsa-miR-32                    | < 1e-07                   | < 1e-07   | 51.4        |
| hsa-miR-95                    | 0.0012682                 | 0.0137588 | 25.706      |
| hsa-miR-20a                   | 0.0016298                 | 0.0143821 | 18.113      |
| hsa-miR-27a                   | 0.0046673                 | 0.025371  | 14.952      |
| hsa-miR-26b                   | 0.0013192                 | 0.0137588 | 14.922      |
| hsa-miR-93                    | 0.0002066                 | 0.0043799 | 14.819      |
| hsa-miR-208                   | 3.89e-05                  | 0.0017202 | 14.2        |
| hsa-miR-23a                   | 5.2e-05                   | 0.0017202 | 13.685      |
| hsa-miR-221                   | 0.0003123                 | 0.0055173 | 12.475      |
| hsa-miR-106b                  | 0.0019293                 | 0.0157312 | 11.793      |
| hsa-miR-106a                  | 0.004788                  | 0.0253764 | 11.249      |
| hsa-miR-15b                   | 0.0043757                 | 0.0244118 | 10.19       |
| hsa-miR-181a                  | 0.0116724                 | 0.0475875 | 9.34        |
| hsa-miR-100                   | 0.0023116                 | 0.0169783 | 9.114       |
| hsa-miR-21                    | 0.0436926                 | 0.1186381 | 9.109       |
| hsa-miR-376c                  | 0.0009224                 | 0.0115029 | 9.03        |
| hsa-miR-107                   | 0.001696                  | 0.0143821 | 8.79        |
| hsa-miR-192*                  | 0.0015374                 | 0.0143821 | 8.631       |
| hsa-miR-130a                  | 0.0379689                 | 0.1045378 | 8.21        |
| hsa-miR-214                   | 0.0083197                 | 0.0367453 | 8.005       |
| hsa-miR-16-2*                 | 0.0040342                 | 0.023757  | 7.754       |
| hsa-miR-23b                   | 4.83e-05                  | 0.0017202 | 7.722       |
| hsa-miR-103                   | 0.0026865                 | 0.0183722 | 7.448       |
| hsa-miR-15a                   | 0.0295121                 | 0.0893795 | 7.257       |
| hsa-miR-26a                   | 0.0071042                 | 0.0334687 | 7.022       |
| hsa-miR-19b                   | 0.0126398                 | 0.0505592 | 5.976       |
| hsa-miR-30a                   | 0.0279578                 | 0.0893795 | 5.797       |
| hsa-miR-125b                  | 0.0490095                 | 0.1267075 | 5.563       |
| hsa-miR-181b                  | 0.0024624                 | 0.017401  | 5.43        |
| hsa-miR-92a                   | 5.68e-05                  | 0.0017202 | 4.662       |
| hsa-miR-191                   | 0.0204731                 | 0.0711524 | 4.426       |
| hsa-miR-30a*                  | 0.0078035                 | 0.0351988 | 4.284       |
| hsa-miR-146a                  | 0.0133744                 | 0.0525069 | 4.026       |
| hsa-miR-223                   | 0.0372938                 | 0.1040301 | 2.509       |
| hsa-miR-138-1*                | 0.0055909                 | 0.0282207 | 2.107       |
| hsa-miR-30d                   | 0.0443574                 | 0.1186381 | 2.079       |
| Down-regulated in MM patients |                           |           |             |
| hsa-miR-323-5p                | 0.0447691                 | 0.1186381 | 0.583       |
| hsa-miR-149                   | 0.0364549                 | 0.1030459 | 0.558       |
| hsa-miR-335*                  | 0.0030646                 | 0.0191087 | 0.462       |
| hsa-miR-30b*                  | 0.0013629                 | 0.0137588 | 0.461       |
| hsa-miR-190                   | 0.0075634                 | 0.0348574 | 0.457       |
| hsa-miR-328                   | 0.0177072                 | 0.0636259 | 0.421       |
| hsa-miR-346                   | 0.0001791                 | 0.0042188 | 0.373       |
| hsa-miR-373*                  | 0.0011776                 | 0.0137588 | 0.371       |
| hsa-miR-198                   | 0.0028464                 | 0.0188574 | 0.279       |
| hsa-miR-101*                  | 0.0149276                 | 0.0565116 | 0.262       |
| hsa-miR-200c*                 | 0.0467811                 | 0.1224394 | 0.244       |
| hsa-miR-202                   | 0.0111322                 | 0.046275  | 0.242       |
| hsa-miR-302d*                 | 0.0322366                 | 0.0949189 | 0.24        |
| hsa-miR-125a-3p               | 0.0360108                 | 0.1030459 | 0.219       |
| hsa-miR-188-5p                | 0.0334685                 | 0.0971962 | 0.215       |
| hsa-miR-19b-1*                | 0.0257773                 | 0.0840737 | 0.212       |
| hsa-miR-25*                   | 0.0226938                 | 0.0774264 | 0.196       |
| hsa-miR-181c*                 | 0.0246223                 | 0.0815614 | 0.192       |
| hsa-miR-129-3p                | 0.0286576                 | 0.0893795 | 0.186       |
| hsa-miR-302b                  | 0.0294565                 | 0.0893795 | 0.184       |
| hsa-miR-148a*                 | 0.0023225                 | 0.0169783 | 0.168       |
| hsa-miR-92a-1*                | 0.0099747                 | 0.0422927 | 0.161       |
| hsa-miR-218                   | 0.0069806                 | 0.0334687 | 0.16        |
| hsa-miR-338-3p                | 0.0198039                 | 0.0699738 | 0.16        |
| hsa-miR-30c-1*                | 0.0094994                 | 0.0410994 | 0.153       |

| miRNA           | Parametric <i>P</i> value | FDR       | Fold change |
|-----------------|---------------------------|-----------|-------------|
| hsa-miR-33b     | 0.002048                  | 0.0160806 | 0.127       |
| hsa-miR-7       | 0.0155802                 | 0.0579474 | 0.123       |
| hsa-miR-105*    | 0.0006145                 | 0.0093053 | 0.121       |
| hsa-miR-187     | 0.0030122                 | 0.0191087 | 0.115       |
| hsa-miR-26a-1*  | 4.25e-05                  | 0.0017202 | 0.11        |
| hsa-miR-186     | 0.0004738                 | 0.0077266 | 0.109       |
| hsa-miR-23a*    | 0.0016261                 | 0.0143821 | 0.108       |
| hsa-miR-335     | 8.59e-05                  | 0.0022763 | 0.107       |
| hsa-miR-200b    | 0.0068521                 | 0.0334687 | 0.102       |
| hsa-miR-196b    | 0.0032343                 | 0.0195906 | 0.096       |
| hsa-miR-193a-5p | 0.0049147                 | 0.0254126 | 0.096       |
| hsa-miR-339-5p  | 0.0043508                 | 0.0244118 | 0.091       |

MiRNAs are sorted by *P* value of the univariate test (BRB tools). The first 74 genes are significant at the nominal 0.01 level of the univariate test.[C]

**Table S6. Common miRNAs expressed between MM PCs and MM patients**

| miRNA                 | Fold change MM patients | Fold change MM PCs |
|-----------------------|-------------------------|--------------------|
| Common up-regulated   |                         |                    |
| hsa-miR-25            | 71.396                  | 224.3              |
| hsa-miR-32            | 51.4                    | 288.98             |
| hsa-miR-95            | 25.706                  | 201.69             |
| hsa-miR-20a           | 18.113                  | 72.32              |
| hsa-miR-27a           | 14.952                  | 54.417             |
| hsa-miR-26b           | 14.922                  | 18.38              |
| hsa-miR-93            | 14.819                  | 48.17              |
| hsa-miR-208           | 14.2                    | 8.47               |
| hsa-miR-23a           | 13.685                  | 6.98               |
| hsa-miR-221           | 12.475                  | 8.48               |
| hsa-miR-106b          | 11.793                  | 38.49              |
| hsa-miR-106a          | 11.249                  | 67.06              |
| hsa-miR-15b           | 10.19                   | 12.9               |
| hsa-miR-181a          | 9.34                    | 25.47              |
| hsa-miR-100           | 9.114                   | 25.2               |
| hsa-miR-21            | 9.109                   | 24.14              |
| hsa-miR-376c          | 9.03                    | 11.29              |
| hsa-miR-107           | 8.79                    | 20.1               |
| hsa-miR-192*          | 8.631                   | 6.62               |
| hsa-miR-130a          | 8.21                    | 12.72              |
| hsa-miR-214           | 8.005                   | 13.38              |
| hsa-miR-16-2*         | 7.754                   | 13.46              |
| hsa-miR-23b           | 7.722                   | 5.05               |
| hsa-miR-103           | 7.448                   | 15.33              |
| hsa-miR-26a           | 7.022                   | 10.08              |
| hsa-miR-19b           | 5.976                   | 7.14               |
| hsa-miR-30a           | 5.797                   | 8.50               |
| hsa-miR-125b          | 5.563                   | 27.95              |
| hsa-miR-181b          | 5.43                    | 13.73              |
| hsa-miR-92a           | 4.662                   | 11.60              |
| hsa-miR-191           | 4.426                   | 15.67              |
| hsa-miR-146a          | 4.026                   | 6.58               |
| hsa-miR-138-1*        | 2.107                   | 5.47               |
| hsa-miR-30d           | 2.079                   | 6.0                |
| Common down-regulated |                         |                    |
| hsa-miR-323-5p        | 0.583                   | 0.621              |
| hsa-miR-335*          | 0.462                   | 0.58               |
| hsa-miR-30b*          | 0.461                   | 0.416              |
| hsa-miR-328           | 0.421                   | 0.476              |
| hsa-miR-198           | 0.279                   | 0.345              |
| hsa-miR-125a-3p       | 0.219                   | 0.226              |
| hsa-miR-23a*          | 0.108                   | 0.027              |
| hsa-miR-335           | 0.107                   | 0.201              |
| hsa-miR-196b          | 0.096                   | 0.240              |
| hsa-miR-193a-5p       | 0.096                   | 0.204              |

[D]
